# Supplementary material for: Predicting the fluid behavior of random microfluidic mixers using convolutional neural networks
Source: Royal Society of Chemistry journal article supplement (doi:10.1039/d0lc01158d), 2020-12-09
Supplement: d0lc01158d1.pdf [file d0lc01158d1.pdf]

Supplementary Information for  
*Predicting the fluid behavior of random microfluidic mixers using convolutional neural networks*

Junchao Wang,<sup>1\*</sup> Naiyin Zhang,<sup>2</sup>  
Jinkai Chen,<sup>1</sup> Guodong Su,<sup>1</sup>  
Hailong Yao,<sup>3</sup> Tsung-Yi Ho,<sup>4</sup> and Lingling Sun<sup>1</sup>

<sup>1</sup>Key Laboratory of RF Circuits and Systems, Ministry of Education,  
and Zhejiang Provincial Laboratory of Integrated Circuit Design,  
Hangzhou Dianzi University, China.

<sup>2</sup>School of Artificial Intelligence, Hangzhou Dianzi University, China.

<sup>3</sup>Department of Computer Science and Technology,  
Tsinghua University, Beijing, China.

<sup>4</sup>Department of Computer Science,  
National Tsing Hua University, Hsinchu, Taiwan.

Please find all the following files in [github.com/junchaolab/randomCNN](https://github.com/junchaolab/randomCNN).

## 1 Supplementary files for quantitative analysis of the CNN library

- *qAnalysis.m* is the MATLAB script we used for quantitative analysis of the CNN library.
- *cnnBenchmark.csv* is the raw matching data of 1,000 benchmarks by using the CNN library.
- *randomBenchmark.csv* is the raw matching data of 1,000 benchmarks by using the random library.
- *cnnLibrary.mat* is the MATLAB data file containing the outflow rates and concentrations of 41,270 candidate designs in the CNN library.

- *randomLibrary.mat* is the MATLAB data file containing the outflow rates and concentrations of 10,513 candidate designs in the Random library.

## 2 Supplementary files for training of neural networks

- *randomAll.csv* is the dataset of all 10,513 pre-simulated random microfluidic mixers, which is used in all the following script.
- *gridInfo.pkl* is the 15x15 matrix/grid information in numpy format of all 10,513 pre-simulated random microfluidic mixers, which is used in all the following CNN training scripts.
- *flowCNN.py* is the Python script we used for training of flowCNN.
- *cCNN.py* is the Python script we used for training of cCNN.
- *ANNVelocity.py* is the Python script we used for training of ANN model to predict three outflow rates. (Described in Section 3.4.1.)
- *ANNConcentration.py* is the Python script we used for training of ANN model to predict three outflow concentrations. (Described in Section 3.4.1.)
- *oneCNNmodel.py* is the Python script we used for training of the single CNN model to predict three outflow rates and concentrations. (Described in Section 3.4.2.)
- *cnnConcentrationThreeOutlets.py* and *cnnConcentrationThreeOutletsNormalized.py* are two Python scripts we used in investigation of necessity of using law of conservation of mass. (Described in Section 3.4.3.)
